# Supplementary material for: High diversity and suggested endemicity of culturable Actinobacteria in an extremely oligotrophic desert oasis
Source: PeerJ. 2017 May 2;5:e3247. doi: 10.7717/peerj.3247 (PMC5417069; doi:10.7717/peerj.3247)
Supplement: Table S1 — Sequence analysis of the cultured Actinobacteria isolated from the intermediate lagoon in Churince system, based on partial 16S rDNA gene sequencing. [file peerj-05-3247-s001.xlsx]

## Sheet: Hoja1
Sequence	Representative	Accession	Sequence	Nearest type	Accession 2	Sequence Indentity	Source of nearest
No.	isolate	no.	length (bp)	strain	no.	%	type strain
1	NOCH_1.A	KY355727	1120	Nocardia seriolae	CP017839	99	Anguila japonica
2	NOCH_2.A	KY327810	1367	Nocardia otitidiscaviarum	EU203569	99	pleural fluid
3	NOCH_3.A	KY327813	1335	Nocardia otitidiscaviarum	EU203569	99	pleural fluid
4	NOCH_4.A	KY327798	1300	Nocardia otitidiscaviarum	KU356876	99	brain abscess
5	NOCH_5.A	KY355729	918	Nocardia sp.	LC011664	98	stem of rice (Oryza sativa L.) plants
6	NOCH_6.A	KY355728	1113	Nocardia seriolae	CP017839	99	Anguila japonica
7	NOCH_7.A	KY355730	703	Nocardia otitidiscaviarum	KU356876	97	brain abscess
8	NOCH_10.F	KY327812	1390	Nocardia otitidiscaviarum	EU203569	99	pleural fluid
9	NOCH_11.A	KY327811	1371	Nocardia otitidiscaviarum	EU203569	99	pleural fluid
10	NOCH_12.C	KY327800	1391	Nocardia otitidiscaviarum	EU203569	99	pleural fluid
11	NOCH_13.C	KY327802	1302	Nocardia otitidiscaviarum	KU356876	99	brain abscess
12	NOCH_14_F	KY327815	1379	Nocardia otitidiscaviarum	EU203569	99	pleural fluid
13	NOCH_15.A	KY327814	1392	Nocardia otitidiscaviarum	EU203569	99	pleural fluid
14	NOCH_16.F	KY327804	1300	Nocardia otitidiscaviarum	KU356876	98	brain abscess
15	NOCH_17.B	KY327803	1299	Nocardia otitidiscaviarum	KU356876	98	brain abscess
16	NOCH_18.A	KY327808	1167	Nocardia otitidiscaviarum	KU356876	98	brain abscess
17	NOCH_29.F	KY327816	1369	Nocardia otitidiscaviarum	EU203569	99	pleural fluid
18	NOCH_36_F	KY327817	1403	Nocardia otitidiscaviarum	EU203569	99	pleural fluid
19	NOCH_37.F	KY327818	1366	Nocardia otitidiscaviarum	EU203569	99	pleural fluid
20	NOCH_38.C	KY354189	1372	Nocardia otitidiscaviarum	EU203569	99	pleural fluid
21	NOCH_52.A	KY354191	1360	Nocardia otitidiscaviarum	EU203569	99	pleural fluid
22	STCH_26.A	KY435619	1100	Streptomyces mutabilis	KJ020694	99
23	STCH_30.F	KY435621	1291	Streptomyces sp.	KC414012	99	Saharan soil
24	STCH_31.B	KY435622	766	Streptomyces sp.	JQ808043	99	soil
25	STCH_47.A	KY435623	1190	Streptomyces gardneri	KF317978	99
26	STCH_53.A	KY436420	1267	Streptomyces sp.	KX863512	99	grassland soil
27	STCH_106.F	KY354190	1332	Streptomyces enissocaesilis	LN870276	97	Rhizospheric soil
28	STCH_123.C	KY436523	1333	Streptomyces pactum	CP016795	99
29	STCH_160.C	KY436759	1349	Streptomyces bacillaris	KP718510	100	Yellow sea, marine sediment
30	STCH_163.C	KY436761	1339	Streptomyces bacillaris	KP718510	99	Yellow sea, marine sediment
31	STCH_169.F	KY436828	1257	Streptomyces sp.	KM678018	99	eastern Thai mangrove sediments
32	STCH_171.E	KY436897	504	Streptomyces sp.	KM678018	99	mangrove sediments
33	STCH_185_E	KY436896	311	Streptomyces sp.	KU681239	99	saline-alkaline soil
34	STCH_186.F	KY436829	1346	Streptomyces pactum	CP016795	100
35	STCH_189_C	KY436900	584	Streptomyces sp.	KU173818	99	marine sediments
36	STCH_190.A	KY436901	714	Streptomyces sp.	JF950284	100	marine sediments
37	STCH_193.B	KY436902	1351	Streptomyces sp.	AB841031	99	rhizospheric soil of rice
38	STCH_194.C	KY440400	1450	Streptomyces bacillaris	KP718510	99	Yellow sea, marine sediment
39	STCH_195.C	KY440399	1089	Streptomyces sp.	DQ448731	99	marine sediments
40	STCH_612.D	KY445919	1097	Streptomyces sp.	KM229361	99	forest soil
41	STCH_197.C	KY440747	1337	Streptomyces bacillaris	KP718510	100	Yellow sea, marine sediment
42	STCH_201.A	KY440957	1371	Streptomyces sp.	AB841031	99	rhizospheric soil of rice
43	STCH_203.F	KY441103	577	Streptomyces cavourensis	KX013537	99	medicinal plant
44	STCH_207.C	KY441411	1358	Streptomyces sp.	KM678018	99	Thai mangrove sediments
45	STCH_230.C	KY441439	623	Streptomyces sp	JF950272	99	marine sediments
46	STCH_235.B	KY441441	902	Streptomyces sp.	KY015026	99	Marine Sponges
47	STCH_403.D	KY441444	1336	Streptomyces pactum	CP016795	100
48	STCH_407.F	KY441443	1310	Streptomyces sp.	KX863512	100	grassland soil
49	STCH_409.C	KY441450	1342	Streptomyces pactum	CP016795	100
50	STCH_500.A	KY441451	1275	Streptomyces sp.	KX279526	99	Water-Fetzara Lake
51	STCH_506.D	KY441463	1359	Streptomyces bacillaris	KP718510	100	Yellow sea, marine sediment
52	STCH_516.B	KY445386	281	Streptomyces pactum	KY120281	100	Water Sample Antarctica
53	STCH_565.A	KY445387	1333	Streptomyces sp.	KM678018	99	mangrove sediments
54	STCH_577.C	KY445388	1240	Streptomyces sp.	KM678018	99	mangrove sediments
55	STCH_580.B	KY445389	1328	Streptomyces sp.	KM590925	100	sediment
56	STCH_604.D	KY445916	1337	Streptomyces sp.	KC856860	100	marine ascidians
57	STCH_605.D	KY445918	1301	Streptomyces sp.	LC073309	99	rhizosphere soil
58	STCH_610.A	KY452454	1347	Streptomyces sp.	KM678018	100	mangrove sediments
59	STCH_617.D	KY445920	1347	Streptomyces sp.	KM678018	100	mangrove sediments
60	STCH_628.D	KY445932	1287	Streptomyces sp.	LC073309	99	rhizosphere soil
61	STCH_636.B	KY508961	304	Streptomyces sp.	KY465886	100
62	STCH_649.E	KY452026	1314	Streptomyces sp.	JX007976	99	marine sponge
63	STCH_665.C	KY453992	1045	Streptomyces sp.	KM678018.1	100	mangrove sediments
64	STCH_671.D	KY453993	1292	Streptomyces sp.	KT581316	99	rhizosphere soil
65	STCH_673.D	KY453994	1221	Streptomyces sp.	KM678018	99	mangrove sediments
66	STCH_676.A	KY453995	1319	Streptomyces sp.	KM678018	100	mangrove sediments
67	STCH_695.C	KY453996	1301	Streptomyces sp.	EU214931	99	marine sediment
68	STCH_698.E	KY454014	1306	Streptomyces sp.	JX007976	99	Sea sponges
69	STCH_699.E	KY454013	1258	Streptomyces violaceochromogenes	KU973994	99	root
70	STCH_700.D	KY454015	1151	Streptomyces sp.	KM229361	99	forest soil
71	STCH_678.D	KY457841	286	Streptomyces novaecaesareae	KU214677	99
72	STCH_209.E	KY441440	1099	Streptomyces sp.	KY015003	100	Marine Sponges
73	STCH_602.E	KY445917	1008	Streptomyces sp.	KY203671	100
74	STCH_653.D	KY452455	1055	Streptomyces viridogenes	EF418611	99
75	STCH_627.E	KY445934	1197	Streptomyces sp.	HQ873930	99	marine sediment Sea Cortez
76	STCH_648.C	KY451834	1094	Streptomyces sp.	KM678018	99	mangrove sediments
77	STCH_619.D	KY445921	1099	Streptomyces sp.	KM678018	99	mangrove sediments
78	STCH_630.D	KY445935	474	Streptomyces rhizosphaericus	KP209441	99	plant
79	STCH_196.E	KY440748	571	Streptomyces sp.	KM678018	99	mangrove sediments
80	NPCH_148.F	KY435371	1314	Nocardiopsis sp.	KC856806	99	marine ascidians
81	NPCH_614.B	KY435618	392	Nocardiopsis sp.	KU535898	99	Desert of India
82	NPCH_164.B	KY435370	1312	Nocardiopsis sp.	KC856806	99	marine ascidians
83	NPCH_192.E	KY435442	1397	Nocardiopsis sp.	KM886159	99	associated with marine sponges
84	NPCH_204_D	KY435443	1320	Nocardiopsis sp.	EU384273	99	soil
85	NPCH_200.A	KY435441	723	Nocardiopsis sp.	KF543081	100	Sea water
86	NPCH_208.E	KY435453	1383	Nocardiopsis sp.	KM886159	99	South China Sea
87	NPCH_221.C	KY435834	1314	Nocardiopsis sp.	KM886159	99	associated with marine sponges
88	NPCH_223.C	KY435836	1339	Nocardiopsis sp.	KM886159	100	associated with marine sponges
89	NPCH_232.A	KY435504	1320	Nocardiopsis dassonvillei	KC493994	99	Yellow River Delta
90	NPCH_236.A	KY435833	1314	Nocardiopsis sp.	KM886159	99	associated with marine sponges
91	NPCH_237.A	KY435835	1300	Nocardiopsis sp.	KM886159	100	associated with marine sponges
92	NPCH_401.D	KY435832	1314	Nocardiopsis sp.	KM886159	99	associated with marine sponges
93	NPCH_663.C	KY435617	566	Nocardiopsis sp.	AB609587	99	deep-sea sediment
94	NPCH_667.B	KY435620	1223	Nocardiopsis flavescens	KU535898	99	leaf
95	MCCH_187_C	KY327799	1302	Micrococcus sp.	KX289492	100	soil
96	MCCH_685.A	KY434663	578	Micrococcus yunnanensis	KX792238	100	rhizobacteria from cheery
97	BCCH_696.E	KY434185	1299	Blastococcus sp.	DQ448697	99	marine sediments
98	ABCH_199.B	KY434186	1314	Arthrobacter sp.	KJ679354	99	salinized soils
99	ABCH_95.B	KY327809	1302	Arthrobacter sp.	LN483070	99
100	ABCH_94.B	KY434159	1297	Arthrobacter sp.	LN483070	98
101	GMCH_233.B	KY434326	1260	Glycomyces sp.	JQ819254	99	isolated from the coastal halophyte
102	VSCH_655.D	KY327806	1299	Verrucosispora sp.	KU382350	99	crater lakes
103	MBCH_579.C	KY434330	764	Microbacterium sp.	KY007183	100	grassland soil
104	KOCH_198.F	KY434635	1306	Kocuria rhizophila	KT387335	99	seafood effluent
105	CMCH_127.C	KY327797	1300	Cellulosimicrobium funkei	KC355259	99	rhizosphere
